# Supplementary material
Source: Frontiers journal article supplement (https://www.frontiersin.org/articles/261391)
Supplement: Table_4.xlsx [file Table_4.xlsx]

## Sheet: Sheet1
Idalopiridine versus Donepezil, Positive BOLD Volume of Activity
15-25 Min Post Treatment				25-35 Min Post Treatment				35-45 Min Post Treatment
Region of Interest(ROI)	I	D	P val	Region of Interest(ROI)	I	D	P val	Region of Interest(ROI)	I	D	P val
medial geniculate	0	21.5	0.026	retrochiasmatic nucleus	1.5	0	0.012	raphe obscurus nucleus	2	0	0.011
anterior olfactory nucleus	7.5	32.5	0.029	raphe obscurus nucleus	3	0	0.048	retrochiasmatic nucleus	1.5	0	0.028
dorsal raphe	0	8	0.049	parvicellular reticular nucleus	47	24.5	0.091	gigantocellular reticular n. pons	77.5	10.5	0.04
lemniscal nucleus	1	20	0.07	inferior olivary complex	15.5	2	0.099	medial pretectal area	0	0	0.04
lateral geniculate	0.5	18.5	0.09	medial pretectal area	0	0	0.104	parvicellular reticular nucleus	59.5	21.5	0.041
insular ctx	28	106.5	0.091	pineal gland	0	0	0.104	inferior olivary complex	13.5	3	0.06
cochlear nucleus	2.5	20.5	0.099	gigantocellular reticular n. pons	63.5	14.5	0.116	crus 1 of ansiform lobule	74	14	0.062
lateral orbital ctx	0	9.5	0.104	anterior olfactory nucleus	7.5	16.5	0.118	dorsal lateral striatum	23.5	0	0.063
anterior amygdaloid nucleus	0	0	0.104	habenula nucleus	3.5	19	0.124	8th cerebellar lobule	33	0	0.064
external plexiform layer	33	55.5	0.109	ventromedial thalamic nucleus	1.5	0	0.13	ectorhinal ctx	10	0.5	0.082
raphe obscurus nucleus	1	0	0.112	medial geniculate	4.5	14	0.135	subthalamic nucleus	0	0	0.103
central amygdaloid nucleus	0	6.5	0.116	paramedian lobule	56.5	22.5	0.147	paramedian lobule	39.5	12	0.106
5th cerebellar lobule	6.5	68	0.118	10th cerebellar lobule	23.5	3	0.149	claustrum	0.5	0	0.125
dentate gyrus ventral	3	39	0.124	infralimbic ctx	5	9.5	0.151	reticular nucleus	16	0	0.131
CA3 ventral hippocampus	2	16	0.127	tenia tecta ctx	9.5	36	0.16	retrosplenial caudal ctx	14.5	4.5	0.14
olfactory tubercles	16.5	92	0.151	lateral amygdaloid nucleus	3	0	0.168	primary somatosensory ctx barrel field	102	12	0.141
secondary motor ctx	0	61	0.156	crus 2 of ansiform lobule	48.5	1.5	0.175	reticulotegmental nucleus	0	0	0.159
medial septum	0	2.5	0.167	lemniscal nucleus	3.5	13	0.178	periolivary nucleus	4.5	0	0.169
parietal ctx	1.5	34.5	0.174	anterior amygdaloid nucleus	0	0	0.193	primary somatosensory ctx forelimb	20	0	0.17
ventral pallidum	3	11.5	0.174	reticulotegmental nucleus	0	0	0.193	ventromedial thalamic nucleus	1	0	0.171
glomerular layer	44.5	104	0.181	zona incerta	2	0.5	0.2	primary somatosensory ctx trunk	3.5	0	0.172
ventral tegmental area	0	2	0.187	caudal piriform ctx	22.5	7.5	0.212	ventral medial striatum	12	0	0.178
ventral orbital ctx	1	4	0.192	trapezoid body	1	0	0.213	neural lobe pituitary	6	2.5	0.179
periaqueductal gray thalamus	27	65	0.195	dorsal raphe	0.5	3	0.216	medial geniculate	8.5	17	0.179
root of trigeminal nerve	21.5	46.5	0.197	ventral medial striatum	7	1	0.234	9th cerebellar lobule	19	3	0.2
temporal ctx	3	12.5	0.2	ventral orbital ctx	1	4	0.238	interpeduncular nucleus	5.5	0.5	0.208
retrochiasmatic nucleus	1	0	0.201	lateral dorsal thalamic nucleus	1.5	0.5	0.242	dorsal medial striatum	12.5	0	0.217
habenula nucleus	6.5	24.5	0.205	bed nucleus stria terminalis	5	0	0.244	ventral orbital ctx	1.5	6.5	0.225
frontal association ctx	3	9.5	0.208	9th cerebellar lobule	34	1.5	0.245	globus pallidus	1.5	0	0.225
medial orbital ctx	4.5	16	0.208	8th cerebellar lobule	33	1.5	0.245	10th cerebellar lobule	14	0.5	0.227
granular cell layer	57	110	0.213	medial septum	0	2	0.26	principal sensory nucleus trigeminal	34	24	0.23
supramammillary nucleus	0	2.5	0.217	dentate gyrus ventral	7	32	0.264	caudal piriform ctx	15	11.5	0.23
magnocellular preoptic nucleus	0	1	0.221	principal sensory nucleus trigeminal	27	18.5	0.285	lateral amygdaloid nucleus	4	0.5	0.232
paraventricular hypothalamic nucleus	0	1.5	0.223	CA2 hippocampus	0	0	0.289	bed nucleus stria terminalis	6	0	0.234
entorhinal ctx	24	146.5	0.23	reticular nucleus	6.5	0	0.296	crus 2 of ansiform lobule	30.5	4	0.239
primary somatosensory ctx jaw	5	20	0.234	ventral lateral striatum	6	0	0.296	7th cerebellar lobule	7	0	0.255
tenia tecta ctx	6	29	0.234	crus 1 of ansiform lobule	66.5	19	0.302	temporal ctx	6	2	0.26
primary motor ctx	3	109	0.243	cochlear nucleus	3	16	0.303	pineal gland	0	0	0.264
flocculus cerebellum	3.5	10.5	0.257	rostral piriform ctx	100	78.5	0.307	primary somatosensory ctx upper lip	53.5	6.5	0.264
infralimbic ctx	4	10.5	0.257	primary somatosensory ctx barrel field	53	22.5	0.323	auditory ctx	52.5	13.5	0.266
pineal gland	0	0	0.264	extended amydala	0	0	0.329	primary somatosensory ctx hindlimb	23.5	1	0.272
superior colliculus	50	112	0.264	dorsal medial nucleus	0	0	0.338	habenula nucleus	13	18.5	0.285
medial amygdaloid nucleus	3	7	0.277	dorsal lateral striatum	14	0	0.342	visual 2 ctx	74.5	25	0.286
substantia nigra reticularis	6.5	29	0.281	secondary somatosensory ctx	31.5	8	0.346	CA2 hippocampus	1	0	0.302
intercalated amygdaloid nucleus	0	0	0.285	medial dorsal thalamic nucleus	4.5	6	0.368	primary somatosensory ctx shoulder	4.5	0	0.305
anterior hypothalamic area	1.5	12	0.285	locus ceruleus	0	0	0.371	dorsomedial tegmental area	0	5.5	0.305
parabrachial nucleus	0	10.5	0.285	olfactory tubercles	45	83.5	0.374	visual 1 ctx	101	16	0.306
perirhinal ctx	13	46	0.286	external plexiform layer	24	38	0.374	pontine nuclei	32.5	18	0.307
medial preoptic area	3	14	0.292	reuniens nucleus	1.5	0.5	0.375	extended amydala	0	0	0.312
inferior olivary complex	10.5	6	0.297	ectorhinal ctx	7	1.5	0.384	dorsal raphe	0.5	3	0.329
substantia nigra compacta	0.5	1.5	0.301	medial orbital ctx	9.5	13.5	0.39	ventral posteriolmedial thalamic nucleus	7	0	0.342
accumbens shell	4	16	0.302	frontal association ctx	4.5	6	0.393	arcuate nucleus hypothalamus	5.5	3.5	0.365
gigantocellular reticular nucleus pons	38	15.5	0.302	central medial thalamic nucleus	0	0	0.396	6th cerebellar lobule	43.5	15.5	0.369
4th cerebellar lobule	2.5	28.5	0.323	globus pallidus	0	0	0.397	primary somatosensory ctx jaw	41.5	7.5	0.369
lateral dorsal thalamic nucleus	2	1	0.323	glomerular layer	30.5	87.5	0.398	locus ceruleus	0	0	0.371
diagonal band of Broca	1	7.5	0.329	retrosplenial caudal ctx	9	7	0.41	dorsal medial nucleus	0	0	0.373
9th cerebellar lobule	23	10	0.336	neural lobe pituitary	6	5	0.418	inferior colliculus	89	74	0.374
primary somatosensory ctx shoulder	0	8	0.352	ventral posteriolateral thalamic nucleus	3	0	0.419	rostral piriform ctx	117.5	89.5	0.374
substantia innominata	0	0	0.358	ventral posteriolmedial thalamic nucleus	2.5	0	0.419	posterior thalamic nucleus	6.5	2	0.389
subiculum dorsal	9.5	28	0.365	red nucleus	0	0	0.428	secondary somatosensory ctx	35	3.5	0.39
ventral subiculum	17.5	39	0.369	facial nucleus	8.5	0	0.429	solitary tract nucleus	10	5	0.393
dorsal medial nucleus	0	0	0.373	paraventricular hypothalamic nucleus	0	0.5	0.448	parietal ctx	19	8	0.393
primary somatosensory ctx upper lip	8.5	41	0.374	magnocellular preoptic nucleus	1	1.5	0.46	premammillary nucleus	4	2.5	0.414
inferior colliculus	58	107.5	0.374	interpeduncular nucleus	2	1	0.464	cochlear nucleus	6	14.5	0.421
ventral medial nucleus	2	11	0.377	entorhinal ctx	95	117.5	0.477	4th cerebellar lobule	3.5	24.5	0.449
central gray	0	7	0.377	7th cerebellar lobule	15	1	0.485	reuniens nucleus	2.5	2	0.464
10th cerebellar lobule	14	6.5	0.384	dorsal medial striatum	8.5	0.5	0.485	medial cerebellar nucleus fastigial	1	0	0.471
lateral posterior thalamic nucleus	5.5	24	0.392	primary somatosensory ctx trunk	0.5	0	0.494	anterior cingulate area	20.5	14.5	0.475
lateral hypothalamus	8.5	40.5	0.397	pontine nuclei	22	12.5	0.503	CA3 dorsal hippocampus	18	15.5	0.475
parvicellular reticular nucleus	39	21	0.397	periaqueductal gray thalamus	44.5	55	0.504	central amygdaloid nucleus	2.5	0.5	0.496
primary somatosensory ctx forelimb	3	44	0.41	4th cerebellar lobule	8	18	0.504	tenia tecta ctx	22.5	31.5	0.503
dentate gyrus dorsal	14	56.5	0.415	granular cell layer	39.5	93.5	0.505	dentate gyrus ventral	17	29	0.504
vestibular nucleus	5	24	0.415	primary somatosensory ctx hindlimb	8	0	0.506	external plexiform layer	35.5	36	0.505
median raphe nucleus	0	0.5	0.418	lateral septal nucleus	11.5	7	0.529	ventrolateral thalamic nucleus	1	0	0.526
reticular nucleus midbrain	7.5	50.5	0.423	lateral geniculate	4	11.5	0.529	ventral posteriolateral thalamic nucleus	6	0	0.526
auditory ctx	22.5	74.5	0.423	dentate gyrus dorsal	21	45	0.531	infralimbic ctx	14	14.5	0.531
medial dorsal thalamic nucleus	5	7.5	0.444	flocculus cerebellum	7.5	5.5	0.531	anterior hypothalamic area	7	18.5	0.531
pedunculopontine tegmental area	0	1	0.446	dorsomedial tegmental area	0	2	0.537	pontine reticular nucleus oral	7.5	10.5	0.534
suprachiasmatic nucleus	0	0	0.451	lateral cerebellar nucleus	0	1	0.543	2nd cerebellar lobule	36.5	29.5	0.534
8th cerebellar lobule	24.5	10	0.457	periolivary nucleus	0.5	0	0.544	paraflocculus cerebellum	82.5	81	0.534
paraventricular thalamic nucleus	8	2	0.464	primary somatosensory ctx shoulder	0.5	0	0.544	superior colliculus	75.5	65.5	0.534
extended amydala	0	0	0.464	1st cerebellar lobule	0	0	0.56	red nucleus	0	0	0.536
claustrum	0	1.5	0.464	secondary motor ctx	6	45.5	0.561	motor trigeminal nucleus	2	0	0.536
paramedian lobule	51.5	37	0.469	visual 2 ctx	45	18	0.563	trapezoid body	1	0.5	0.536
2nd cerebellar lobule	15.5	34	0.472	parietal ctx	14.5	5.5	0.583	medial mammillary nucleus	9.5	6.5	0.556
CA2 hippocampus	0	0	0.478	6th cerebellar lobule	56.5	16	0.587	lemniscal nucleus	10	11	0.563
primary somatosensory ctx hindlimb	0	34	0.485	CA1 ventral hippocampus	18	5.5	0.591	cortical amygdaloid nucleus	26.5	23.5	0.563
medial pretectal area	0	0	0.49	ventral subiculum	27	33.5	0.593	sub coeruleus nucleus	0.5	0.5	0.568
subthalamic nucleus	0	0	0.494	ventrolateral thalamic nucleus	1	0.5	0.601	pontine reticular nucleus caudal	3	5	0.583
precuniform nucleus	0	0	0.494	pedunculopontine tegmental area	0	0.5	0.612	central gray	2	7.5	0.587
endopiriform nucleus	0	1	0.494	lateral orbital ctx	0	0.5	0.613	basal amygdaloid nucleus	14	9	0.593
zona incerta	1	5	0.495	basal amygdaloid nucleus	9	7	0.623	retrosplenial rostral ctx	64	77	0.594
parafascicular thalamic nucleus	1	9	0.497	visual 1 ctx	83.5	22	0.623	olfactory tubercles	60.5	79.5	0.594
basal amygdaloid nucleus	1.5	14.5	0.5	superior colliculus	56.5	87	0.625	dorsal paragigantocellularis nucleus	0.5	2	0.609
3rd cerebellar lobule	8	21	0.5	precuniform nucleus	0	0	0.632	pedunculopontine tegmental area	0	0.5	0.612
red nucleus	0	0	0.502	claustrum	0	0	0.653	copula of the pyramis	22	18.5	0.623
dorsomedial tegmental area	0	3.5	0.506	lateral posterior thalamic nucleus	13	22.5	0.655	frontal association ctx	8	10	0.624
primary somatosensory ctx trunk	0	4.5	0.515	triangular septal nucleus	1.5	1	0.675	perirhinal ctx	12.5	13.5	0.624
bed nucleus stria terminalis	2.5	3.5	0.515	substantia nigra compacta	1.5	1	0.679	simple lobule cerebellum	13.5	14.5	0.625
supraoptic nucleus hypothalamus	0	0	0.522	prerubral field	0	0	0.682	anterior amygdaloid nucleus	0	0	0.632
ventromedial thalamic nucleus	0	0	0.525	raphe magnus	0	0	0.682	ventral lateral striatum	2.5	1.5	0.642
reticular nucleus	1.5	0	0.526	premammillary nucleus	2.5	2.5	0.682	facial nucleus	10	3.5	0.653
retrosplenial rostral ctx	25	122	0.533	auditory ctx	35.5	10.5	0.689	medial amygdaloid nucleus	12.5	6.5	0.655
paraflocculus cerebellum	41	104	0.534	perirhinal ctx	15.5	25	0.689	parabrachial nucleus	8.5	8.5	0.656
motor trigeminal nucleus	0	0.5	0.544	reticular nucleus midbrain	19	34.5	0.689	substantia innominata	0	0	0.68
dorsal paragigantocellularis nucleus	1	2.5	0.551	root of trigeminal nerve	31.5	30.5	0.689	prerubral field	0	0	0.682
primary somatosensory ctx barrel field	11.5	95	0.562	subiculum dorsal	10	25.5	0.689	medial septum	0	0.5	0.686
visual 2 ctx	29.5	70.5	0.562	insular ctx	39.5	63.5	0.689	accumbens core	0	0.5	0.686
lateral preoptic area	3	4	0.576	primary motor ctx	19.5	36.5	0.689	ventral medial nucleus	7	6.5	0.687
prelimbic ctx	2.5	6	0.577	solitary tract nucleus	9.5	6.5	0.71	lateral septal nucleus	36	16	0.687
ventral medial striatum	7	4	0.582	simple lobule cerebellum	3.5	18.5	0.714	anterior lobe pituitary	32	26	0.689
anterior pretectal nucleus	2	11	0.587	medial preoptic area	5	5.5	0.717	insular ctx	68.5	73	0.689
retrosplenial caudal ctx	5	26	0.59	anterior cingulate area	10	11.5	0.717	lateral hypothalamus	45.5	37	0.689
CA3 dorsal hippocampus	12.5	24.5	0.59	anterior hypothalamic area	4	9.5	0.719	lateral dorsal thalamic nucleus	1	1	0.702
rostral piriform ctx	67	93.5	0.594	primary somatosensory ctx jaw	13.5	11.5	0.719	prelimbic ctx	7.5	11.5	0.717
1st cerebellar lobule	0	0	0.596	CA1 dorsal hippocampus	8	23	0.721	zona incerta	3	1.5	0.718
pontine reticular nucleus caudal	0	7	0.601	interposed nucleus	0	0	0.736	CA1 dorsal hippocampus	19	32	0.722
posterior hypothalamic area	2.5	5	0.608	copula of the pyramis	34.5	20	0.753	periaqueductal gray thalamus	46.5	69	0.722
central medial thalamic nucleus	0	0	0.613	CA3 ventral hippocampus	12	12	0.755	granular cell layer	42	79	0.722
dorsal lateral striatum	6.5	2.5	0.614	supraoptic nucleus hypothalamus	0	0	0.758	primary motor ctx	59.5	41	0.722
reticulotegmental nucleus	0	0	0.632	motor trigeminal nucleus	0	0	0.762	1st cerebellar lobule	1.5	0.5	0.744
triangular septal nucleus	2.5	0.5	0.635	primary somatosensory ctx forelimb	16.5	2.5	0.776	triangular septal nucleus	2.5	1.5	0.749
anterior cingulate area	1.5	60.5	0.647	posterior thalamic nucleus	11	1.5	0.785	CA1 ventral hippocampus	9.5	12.5	0.755
visual 1 ctx	58	74	0.653	ventral pallidum	5	5.5	0.786	CA3 ventral hippocampus	13.5	14.5	0.755
pontine reticular nucleus oral	4	7	0.683	diagonal band of Broca	4	3.5	0.787	3rd cerebellar lobule	16.5	14.5	0.755
lateral septal nucleus	22.5	27	0.684	substantia nigra reticularis	12.5	21.5	0.789	lateral posterior thalamic nucleus	18	20.5	0.755
neural lobe pituitary	4.5	6.5	0.685	retrosplenial rostral ctx	45.5	82	0.79	glomerular layer	44	85	0.756
globus pallidus	0	0	0.686	accumbens core	0	0	0.8	reticular nucleus midbrain	35.5	35	0.756
anterior lobe pituitary	24	43	0.688	suprachiasmatic nucleus	0	0	0.807	intercalated amygdaloid nucleus	0	0	0.76
arcuate nucleus hypothalamus	2.5	4.5	0.714	medial mammillary nucleus	4.5	12	0.819	substantia nigra compacta	2	1	0.785
crus 2 of ansiform lobule	38.5	21.5	0.714	central amygdaloid nucleus	2	3	0.821	medial preoptic area	7.5	13.5	0.789
simple lobule cerebellum	2	30	0.714	parafascicular thalamic nucleus	5.5	5	0.821	accumbens shell	10	8	0.789
CA1 dorsal hippocampus	8.5	36	0.717	CA3 dorsal hippocampus	12	14	0.822	secondary motor ctx	9.5	30.5	0.789
crus 1 of ansiform lobule	36	79.5	0.719	3rd cerebellar lobule	8.5	16.5	0.824	dentate gyrus dorsal	49	57.5	0.79
cortical amygdaloid nucleus	15.5	15	0.722	inferior colliculus	84.5	81.5	0.824	raphe linear	0	0	0.8
posterior thalamic nucleus	2	4.5	0.748	raphe linear	0	0	0.839	suprachiasmatic nucleus	0	0	0.807
ectorhinal ctx	4.5	6.5	0.749	ventral anterior thalamic nucleus	0.5	1	0.849	ventral anterior thalamic nucleus	0.5	1	0.812
medial cerebellar nucleus fastigial	0	0	0.751	medial cerebellar nucleus fastigial	0	0	0.855	ventral tegmental area	1.5	0.5	0.818
secondary somatosensory ctx	17.5	35	0.751	primary somatosensory ctx upper lip	33	15	0.856	diagonal band of Broca	7	2.5	0.823
pontine nuclei	5.5	15	0.753	vestibular nucleus	15	10	0.856	substantia nigra reticularis	17	20	0.824
trapezoid body	0	0	0.761	accumbens shell	6	5	0.857	medial orbital ctx	11.5	10.5	0.857
interpeduncular nucleus	0.5	2	0.775	pontine reticular nucleus oral	8.5	8	0.857	posterior hypothalamic area	5.5	6.5	0.857
solitary tract nucleus	7.5	10.5	0.784	2nd cerebellar lobule	25	23	0.859	anterior thalamic nuclei	10	12	0.858
lateral cerebellar nucleus	0	0	0.791	5th cerebellar lobule	15.5	39.5	0.859	5th cerebellar lobule	43	59.5	0.859
locus ceruleus	0	0	0.807	cortical amygdaloid nucleus	27.5	18	0.859	paraventricular hypothalamic nucleus	0.5	1	0.887
raphe magnus	0	0	0.807	lateral hypothalamus	35.5	22.5	0.859	lateral preoptic area	1.5	3	0.889
facial nucleus	1.5	0	0.807	substantia innominata	0	0	0.871	magnocellular preoptic nucleus	1	1	0.889
copula of the pyramis	26.5	28	0.821	subthalamic nucleus	0	0	0.871	lateral orbital ctx	1.5	2.5	0.889
6th cerebellar lobule	14.5	53	0.855	sub coeruleus nucleus	0	0	0.874	paraventricular thalamic nucleus	4.5	6.5	0.893
premammillary nucleus	2.5	3.5	0.856	ventral tegmental area	0.5	0.5	0.887	vestibular nucleus	16.5	18.5	0.893
caudal piriform ctx	16.5	14	0.857	supramammillary nucleus	1	1	0.89	anterior olfactory nucleus	17	13.5	0.894
interposed nucleus	0	0	0.879	posterior hypothalamic area	6.5	5	0.893	ventral subiculum	30.5	37.5	0.894
accumbens core	0	3.5	0.884	parabrachial nucleus	3.5	6	0.893	entorhinal ctx	97	118.5	0.894
lateral amygdaloid nucleus	0.5	1.5	0.889	anterior pretectal nucleus	8	10.5	0.893	supraoptic nucleus hypothalamus	0	0	0.91
raphe linear	0	0	0.919	paraflocculus cerebellum	65	74	0.894	precuniform nucleus	0	0	0.916
ventrolateral thalamic nucleus	0	0.5	0.922	lateral preoptic area	0	0	0.916	lateral cerebellar nucleus	0	0	0.918
ventral anterior thalamic nucleus	0	1	0.924	intercalated amygdaloid nucleus	0	0	0.919	subiculum dorsal	20.5	28.5	0.929
ventral posteriolmedial thalamic nucleus	2.5	0.5	0.924	endopiriform nucleus	0	0.5	0.922	interposed nucleus	0	0	0.958
reuniens nucleus	1.5	1	0.926	pontine reticular nucleus caudal	0	6	0.922	central medial thalamic nucleus	0	0	0.958
CA1 ventral hippocampus	5.5	10	0.927	dorsal paragigantocellularis nucleus	0.5	0.5	0.924	median raphe nucleus	0	0	0.958
medial mammillary nucleus	4.5	12	0.928	central gray	1.5	2.5	0.924	endopiriform nucleus	0	0.5	0.961
prerubral field	0	0	0.955	temporal ctx	3.5	5	0.927	supramammillary nucleus	1.5	1	0.963
periolivary nucleus	0	0	0.96	anterior thalamic nuclei	5.5	11.5	0.927	lateral geniculate	10.5	14	0.964
sub coeruleus nucleus	0	0.5	0.961	arcuate nucleus hypothalamus	3	3.5	0.928	medial dorsal thalamic nucleus	6	7.5	0.964
7th cerebellar lobule	9	8.5	0.963	paraventricular thalamic nucleus	6	4	0.928	ventral pallidum	7.5	9	0.964
dorsal medial striatum	7	17	0.963	ventral medial nucleus	5	4	0.928	root of trigeminal nerve	36	39.5	0.965
anterior thalamic nuclei	9	12	1	median raphe nucleus	0	0	0.958	anterior pretectal nucleus	9.5	10.5	0.965
principal sensory nucleus trigeminal	24.5	30	1	medial amygdaloid nucleus	9.5	2	0.964	parafascicular thalamic nucleus	5	6.5	0.965
ventral lateral striatum	3.5	2	1	anterior lobe pituitary	30	31.5	0.964	flocculus cerebellum	7.5	6.5	1
ventral posteriolateral thalamic nucleus	0	0.5	1	prelimbic ctx	6	7	1	raphe magnus	0	0	1
