# Supplementary material
Source: Frontiers journal article supplement (https://www.frontiersin.org/articles/261391)
Supplement: Table_5.xlsx [file Table_5.xlsx]

## Sheet: Sheet1
Idalopiridine versus Idalopiridine/Donepezil, Positive BOLD Volume of Activation
15-25 Min Post Treatment					25-35 Min Post Treatment					35-45 Min Post Treatment
Region of Interest(ROI)	I	I/D	P val		Region of Interest(ROI)	I	I/D	P val		Region of Interest(ROI)	I	I/D	P val
red nucleus	0	1	0.023		medial pretectal area	0	0	0.022		medial pretectal area	0	0	0.022
anterior olfactory nucleus	7.5	32	0.033		anterior olfactory nucleus	7.5	33	0.024		medial orbital ctx	11.5	21	0.044
tenia tecta ctx	6	46	0.038		granular cell layer	39.5	81	0.03		subthalamic nucleus	0	0	0.054
ventral tegmental area	0	4	0.042		lateral orbital ctx	0	14	0.031		red nucleus	0	1	0.056
medial preoptic area	3	25	0.046		medial preoptic area	5	26	0.036		1st cerebellar lobule	1.5	0	0.073
infralimbic ctx	4	19	0.056		pedunculopontine tegmental area	0	5	0.038		lateral posterior thalamus	18	39	0.079
medial amygdaloid nucleus	3	12	0.07		tenia tecta ctx	9.5	47	0.039		anterior lobe pituitary	32	65	0.079
zona incerta	1	16	0.074		red nucleus	0	2	0.051		precuniform nucleus	0	0	0.082
substantia innominata	0	0	0.082		lateral preoptic area	0	8	0.052		secondary motor ctx	9.5	53	0.093
ventromedial thalamic nucleus	0	11	0.089		infralimbic ctx	5	39	0.053		granular cell layer	42	75	0.121
median raphe nucleus	0	4	0.098		habenula nucleus	3.5	18	0.053		tenia tecta ctx	22.5	42	0.13
pontine reticular nucleus oral	4	12	0.099		medial orbital ctx	9.5	23	0.056		triangular septal nucleus	2.5	10	0.147
anterior lobe pituitary	24	66	0.102		lateral posterior thalamus	13	45	0.059		lateral orbital ctx	1.5	12	0.149
reticular nucleus midbrain	7.5	64	0.102		reticular nucleus midbrain	19	77	0.06		infralimbic ctx	14	28	0.152
central amygdaloid nucleus	0	5	0.11		medial dorsal thalamic nucleus	4.5	11	0.063		perirhinal ctx	12.5	6	0.153
posterior hypothalamic area	2.5	12	0.111		central gray	1.5	7	0.068		substantia innominata	0	0	0.167
parabrachial nucleus	0	5	0.111		anterior lobe pituitary	30	65	0.072		ventral lateral striatum	2.5	36	0.176
pedunculopontine tegmental area	0	4	0.119		glomerular layer	30.5	92	0.072		prelimbic ctx	7.5	12	0.188
ventral pallidum	3	15	0.125		external plexiform layer	24	43	0.079		paraventricular thalamus	4.5	12	0.189
lateral orbital ctx	0	6	0.131		prelimbic ctx	6	18	0.101		medial mammillary nucleus	9.5	4	0.197
CA3 ventral hippocampus	2	6	0.136		zona incerta	2	9	0.101		anterior olfactory nucleus	17	32	0.205
premammillary nucleus	2.5	4	0.136		pontine reticular nucleus caudal	0	29	0.111		anterior cingulate area	20.5	59	0.205
anterior hypothalamic area	1.5	17	0.137		primary somatosensory ctx jaw	13.5	61	0.118		glomerular layer	44	87	0.205
medial geniculate	0	8	0.142		lemniscal nucleus	3.5	14	0.125		medial cerebellar n. fastigial	1	0	0.217
olfactory tubercles	16.5	52	0.151		central medial thalamic nucleus	0	1	0.136		habenula nucleus	13	21	0.219
pontine nuclei	5.5	23	0.163		posterior hypothalamic area	6.5	18	0.138		cochlear nucleus	6	5	0.231
lateral hypothalamus	8.5	31	0.165		ventral tegmental area	0.5	4	0.142		central medial thalamic nucleus	0	1	0.233
granular cell layer	57	85	0.165		3rd cerebellar lobule	8.5	22	0.152		pedunculopontine tegmental area	0	3	0.237
ventral posteriolateral thalamic nucleus	0	16	0.174		extended amydala	0	2	0.158		arcuate nucleus hypothalamus	5.5	3	0.264
basal amygdaloid nucleus	1.5	9	0.176		ventral lateral striatum	6	44	0.161		medial preoptic area	7.5	22	0.27
lemniscal nucleus	1	6	0.18		anterior hypothalamic area	4	14	0.164		supramammillary nucleus	1.5	0	0.278
lateral preoptic area	3	7	0.184		median raphe nucleus	0	7	0.166		retrochiasmatic nucleus	1.5	0	0.282
magnocellular preoptic nucleus	0	2	0.186		precuniform nucleus	0	0	0.168		ventral tegmental area	1.5	5	0.282
extended amydala	0	2	0.187		reticulotegmental nucleus	0	1	0.169		caudal piriform ctx	15	14	0.287
lateral posterior thalamic nucleus	5.5	33	0.188		dentate gyrus ventral	7	24	0.177		primary somatosensory ctx forelimb	20	70	0.288
parafascicular thalamic nucleus	1	15	0.199		White Matter	20.5	55	0.178		superior colliculus	75.5	95	0.288
paraventricular hypothalamic nucleus	0	2	0.203		medial geniculate	4.5	17	0.185		pineal gland	0	0	0.292
lateral amygdaloid nucleus	0.5	5	0.208		paraventricular hypothalamic nucleus	0	2	0.185		prerubral field	0	0	0.298
primary somatosensory ctx jaw	5	72	0.209		paraventricular thalamic nucleus	6	12	0.186		temporal ctx	6	3	0.302
dentate gyrus ventral	3	8	0.214		accumbens core	0	2	0.188		parafascicular thalamic nucleus	5	25	0.307
accumbens shell	4	12	0.216		prerubral field	0	0	0.198		periolivary nucleus	4.5	2	0.318
medial orbital ctx	4.5	15	0.229		ventromedial thalamic nucleus	1.5	6	0.198		bed nucleus stria terminalis	6	12	0.326
raphe magnus	0	0	0.229		parafascicular thalamic nucleus	5.5	21	0.201		simple lobule cerebellum	13.5	34	0.327
external plexiform layer	33	40	0.236		bed nucleus stria terminalis	5	14	0.203		reticular nucleus midbrain	35.5	79	0.327
prerubral field	0	0	0.237		dorsal raphe	0.5	4	0.207		ventral medial nucleus	7	4	0.342
medial dorsal thalamic nucleus	5	9	0.247		reticular nucleus	6.5	25	0.216		anterior thalamic nuclei	10	21	0.346
interpeduncular nucleus	0.5	1	0.256		dorsal lateral striatum	14	103	0.217		medial dorsal thalamic nucleus	6	10	0.346
substantia nigra compacta	0.5	2	0.257		anterior cingulate area	10	50	0.218		CA3 ventral hippocampus	13.5	19	0.347
White Matter	11.5	26	0.268		pontine reticular nucleus oral	8.5	30	0.218		primary motor ctx	59.5	110	0.348
glomerular layer	44.5	50	0.27		entorhinal ctx	95	195	0.221		accumbens core	0	2	0.354
primary somatosensory ctx trunk	0	10	0.27		secondary motor ctx	6	45	0.234		facial nucleus	10	9	0.364
diagonal band of Broca	1	4	0.276		1st cerebellar lobule	0	0	0.247		9th cerebellar lobule	19	26	0.364
solitary tract nucleus	7.5	18	0.284		anterior thalamic nuclei	5.5	22	0.248		posterior hypothalamic area	5.5	15	0.364
anterior amygdaloid nucleus	0	0	0.292		frontal association ctx	4.5	7	0.25		anterior pretectal nucleus	9.5	19	0.368
endopiriform nucleus	0	3	0.296		motor trigeminal nucleus	0	3	0.252		ventral posteriolateral thalamic nucleus	6	16	0.373
reticulotegmental nucleus	0	0	0.298		ventral orbital ctx	1	6	0.258		lateral dorsal thalamic nucleus	1	4	0.378
root of trigeminal nerve	21.5	28	0.307		sub coeruleus nucleus	0	4	0.262		lateral preoptic area	1.5	6	0.379
principal sensory nucleus trigeminal	24.5	32	0.307		simple lobule cerebellum	3.5	31	0.266		ventral subiculum	30.5	50	0.391
habenula nucleus	6.5	18	0.319		interposed nucleus	0	2	0.27		White Matter	16.5	52	0.391
supramammillary nucleus	0	0	0.322		superior colliculus	56.5	88	0.27		paraflocculus cerebellum	82.5	53	0.391
cortical amygdaloid nucleus	15.5	26	0.326		primary motor ctx	19.5	112	0.27		interposed nucleus	0	1	0.401
dorsal raphe	0	4	0.34		medial cerebellar nucleus fastigial	0	0	0.275		median raphe nucleus	0	6	0.401
pontine reticular nucleus caudal	0	16	0.342		ventral posteriolateral thalamic nucleus	3	13	0.276		ventrolateral thalamic nucleus	1	8	0.406
precuniform nucleus	0	0	0.343		premammillary nucleus	2.5	4	0.281		medial geniculate	8.5	15	0.41
entorhinal ctx	24	83	0.348		dorsal medial striatum	8.5	35	0.284		extended amydala	0	2	0.419
primary motor ctx	3	87	0.361		diagonal band of Broca	4	7	0.302		sub coeruleus nucleus	0.5	0	0.427
ventral subiculum	17.5	34	0.368		parabrachial nucleus	3.5	18	0.303		ventromedial thalamic nucleus	1	4	0.45
central gray	0	6	0.373		dentate gyrus dorsal	21	36	0.305		ectorhinal ctx	10	5	0.458
bed nucleus stria terminalis	2.5	6	0.387		CA3 ventral hippocampus	12	19	0.307		central gray	2	6	0.483
3rd cerebellar lobule	8	7	0.389		primary somatosensory ctx shoulder	0.5	10	0.314		frontal association ctx	8	8	0.486
periaqueductal gray thalamus	27	74	0.389		primary somatosensory ctx forelimb	16.5	63	0.315		ventral orbital ctx	1.5	4	0.506
primary somatosensory ctx upper lip	8.5	59	0.39		substantia nigra compacta	1.5	2	0.316		entorhinal ctx	97	168	0.514
central medial thalamic nucleus	0	1	0.401		lateral geniculate	4	16	0.322		raphe magnus	0	0	0.52
arcuate nucleus hypothalamus	2.5	4	0.405		accumbens shell	6	13	0.323		8th cerebellar lobule	33	25	0.534
gigantocellular reticular nucleus pons	38	77	0.414		basal amygdaloid nucleus	9	22	0.326		lateral amygdaloid nucleus	4	5	0.534
rostral piriform ctx	67	101	0.414		primary somatosensory ctx trunk	0.5	10	0.335		ventral medial striatum	12	19	0.538
ventral medial nucleus	2	6	0.42		substantia innominata	0	0	0.343		Ventricle	5.5	8	0.539
parietal ctx	1.5	33	0.42		ventral subiculum	27	54	0.347		accumbens shell	10	15	0.54
raphe linear	0	1	0.426		CA2 hippocampus	0	1	0.353		external plexiform layer	35.5	33	0.54
dorsomedial tegmental area	0	3	0.427		triangular septal nucleus	1.5	9	0.355		CA2 hippocampus	1	1	0.559
5th cerebellar lobule	6.5	7	0.433		periaqueductal gray thalamus	44.5	75	0.368		primary somatosensory ctx shoulder	4.5	8	0.56
substantia nigra reticularis	6.5	24	0.436		lateral septal nucleus	11.5	45	0.368		neural lobe pituitary	6	8	0.563
lateral geniculate	0.5	5	0.437		2nd cerebellar lobule	25	49	0.368		periaqueductal gray thalamus	46.5	48	0.566
secondary motor ctx	0	29	0.445		retrochiasmatic nucleus	1.5	0	0.369		6th cerebellar lobule	43.5	40	0.567
prelimbic ctx	2.5	4	0.451		reuniens nucleus	1.5	3	0.383		crus 2 of ansiform lobule	30.5	59	0.567
reticular nucleus	1.5	17	0.451		supramammillary nucleus	1	0	0.385		intercalated amygdaloid nucleus	0	0	0.567
ventral lateral striatum	3.5	41	0.451		medial amygdaloid nucleus	9.5	12	0.388		principal sensory nucleus trigeminal	34	31	0.567
frontal association ctx	3	6	0.455		solitary tract nucleus	9.5	16	0.389		reticulotegmental nucleus	0	0	0.57
paraventricular thalamic nucleus	8	12	0.457		gigantocellular reticular nucleus pons	63.5	86	0.39		paraventricular hypothalamic nucleus	0.5	2	0.574
CA3 dorsal hippocampus	12.5	13	0.458		globus pallidus	0	5	0.396		dorsal raphe	0.5	4	0.574
intercalated amygdaloid nucleus	0	0	0.46		subthalamic nucleus	0	0	0.403		lateral cerebellar nucleus	0	0	0.584
reuniens nucleus	1.5	2	0.475		ventrolateral thalamic nucleus	1	7	0.406		dorsal lateral striatum	23.5	60	0.594
cochlear nucleus	2.5	2	0.476		posterior thalamic nucleus	11	24	0.41		solitary tract nucleus	10	16	0.595
6th cerebellar lobule	14.5	56	0.484		pontine nuclei	22	30	0.412		dentate gyrus ventral	17	15	0.595
2nd cerebellar lobule	15.5	19	0.486		ventral medial striatum	7	14	0.412		2nd cerebellar lobule	36.5	35	0.595
superior colliculus	50	62	0.486		dorsomedial tegmental area	0	5	0.412		endopiriform nucleus	0	2	0.596
parvicellular reticular nucleus	39	51	0.487		CA1 dorsal hippocampus	8	49	0.413		dorsal paragigantocellularis nucleus	0.5	5	0.604
motor trigeminal nucleus	0	1	0.495		perirhinal ctx	15.5	7	0.414		anterior amygdaloid nucleus	0	0	0.607
posterior thalamic nucleus	2	10	0.506		olfactory tubercles	45	44	0.414		zona incerta	3	7	0.618
dorsal lateral striatum	6.5	28	0.507		lateral amygdaloid nucleus	3	6	0.433		4th cerebellar lobule	3.5	4	0.622
anterior thalamic nuclei	9	10	0.51		Ventricle	4	5	0.435		interpeduncular nucleus	5.5	3	0.622
visual 2 ctx	29.5	78	0.513		root of trigeminal nerve	31.5	48	0.438		primary somatosensory ctx jaw	41.5	79	0.624
primary somatosensory ctx forelimb	3	45	0.525		insular ctx	39.5	90	0.438		pontine reticular nucleus oral	7.5	17	0.624
raphe obscurus nucleus	1	2	0.528		raphe magnus	0	0	0.461		parvicellular reticular nucleus	59.5	61	0.624
ventral orbital ctx	1	2	0.529		dorsal paragigantocellularis nucleus	0.5	6	0.47		trapezoid body	1	0	0.627
inferior olivary complex	10.5	16	0.536		locus ceruleus	0	0	0.478		dorsal medial striatum	12.5	22	0.652
9th cerebellar lobule	23	30	0.538		raphe linear	0	1	0.479		lemniscal nucleus	10	11	0.653
primary somatosensory ctx hindlimb	0	29	0.546		substantia nigra reticularis	12.5	16	0.486		root of trigeminal nerve	36	31	0.653
Ventricle	2.5	7	0.557		caudal piriform ctx	22.5	16	0.487		rostral piriform ctx	117.5	76	0.653
CA1 dorsal hippocampus	8.5	31	0.561		5th cerebellar lobule	15.5	31	0.487		raphe linear	0	1	0.658
dentate gyrus dorsal	14	13	0.562		visual 2 ctx	45	86	0.513		globus pallidus	1.5	3	0.675
subiculum dorsal	9.5	15	0.562		parietal ctx	14.5	32	0.537		primary somatosensory ctx trunk	3.5	8	0.678
primary somatosensory ctx barrel field	11.5	100	0.566		ventral pallidum	5	5	0.538		primary somatosensory ctx hindlimb	23.5	24	0.682
insular ctx	28	78	0.567		CA3 dorsal hippocampus	12	29	0.538		medial amygdaloid nucleus	12.5	14	0.683
perirhinal ctx	13	24	0.567		lateral cerebellar nucleus	0	0	0.539		inferior colliculus	89	62	0.683
lateral cerebellar nucleus	0	0	0.571		supraoptic nucleus hypothalamus	0	0	0.547		lateral septal nucleus	36	40	0.683
anterior cingulate area	1.5	26	0.581		primary somatosensory ctx hindlimb	8	43	0.562		5th cerebellar lobule	43	32	0.683
lateral septal nucleus	22.5	33	0.592		primary somatosensory ctx upper lip	33	60	0.562		paramedian lobule	39.5	49	0.683
secondary somatosensory ctx	17.5	34	0.592		interpeduncular nucleus	2	5	0.564		magnocellular preoptic nucleus	1	2	0.702
trapezoid body	0	2	0.595		principal sensory nucleus trigeminal	27	41	0.567		retrosplenial caudal ctx	14.5	18	0.713
medial mammillary nucleus	4.5	8	0.617		claustrum	0	5	0.586		secondary somatosensory ctx	35	21	0.742
medial pretectal area	0	0	0.62		medial mammillary nucleus	4.5	4	0.589		lateral geniculate	10.5	12	0.743
7th cerebellar lobule	9	16	0.62		anterior pretectal nucleus	8	15	0.592		ventral pallidum	7.5	4	0.743
retrosplenial rostral ctx	25	55	0.624		10th cerebellar lobule	23.5	18	0.592		CA1 dorsal hippocampus	19	45	0.743
flocculus cerebellum	3.5	8	0.645		vestibular nucleus	15	17	0.592		visual 1 ctx	101	80	0.744
paramedian lobule	51.5	69	0.653		cortical amygdaloid nucleus	27.5	26	0.595		lateral hypothalamus	45.5	36	0.744
medial septum	0	1	0.658		medial septum	0	0	0.603		ventral anterior thalamic nucleus	0.5	0	0.757
sub coeruleus nucleus	0	2	0.659		anterior amygdaloid nucleus	0	0	0.607		raphe obscurus nucleus	2	3	0.77
retrochiasmatic nucleus	1	0	0.663		ectorhinal ctx	7	6	0.615		parietal ctx	19	32	0.775
ventral posteriolmedial thalamic nucleus	2.5	9	0.666		9th cerebellar lobule	34	30	0.62		copula of the pyramis	22	28	0.775
claustrum	0	0	0.671		4th cerebellar lobule	8	22	0.623		premammillary nucleus	4	4	0.803
simple lobule cerebellum	2	25	0.671		parvicellular reticular nucleus	47	57	0.624		reuniens nucleus	2.5	3	0.804
triangular septal nucleus	2.5	5	0.674		rostral piriform ctx	100	97	0.624		inferior olivary complex	13.5	17	0.805
vestibular nucleus	5	12	0.675		endopiriform nucleus	0	1	0.627		flocculus cerebellum	7.5	5	0.806
neural lobe pituitary	4.5	5	0.681		primary somatosensory ctx barrel field	53	109	0.652		insular ctx	68.5	100	0.806
crus 1 of ansiform lobule	36	100	0.683		ventral posteriolmedial thalamic nucleus	2.5	3	0.675		substantia nigra reticularis	17	14	0.806
dorsal paragigantocellularis nucleus	1	4	0.697		crus 2 of ansiform lobule	48.5	64	0.683		olfactory tubercles	60.5	58	0.806
primary somatosensory ctx shoulder	0	7	0.698		White Matter	186.5	292	0.683		dorsomedial tegmental area	0	2	0.825
ventrolateral thalamic nucleus	0	4	0.698		intercalated amygdaloid nucleus	0	0	0.704		7th cerebellar lobule	7	12	0.836
anterior pretectal nucleus	2	13	0.702		cochlear nucleus	3	4	0.709		reticular nucleus	16	21	0.837
1st cerebellar lobule	0	0	0.712		auditory ctx	35.5	60	0.713		3rd cerebellar lobule	16.5	15	0.838
periolivary nucleus	0	0	0.716		subiculum dorsal	10	18	0.713		visual 2 ctx	74.5	99	0.838
accumbens core	0	2	0.724		inferior olivary complex	15.5	16	0.741		substantia nigra compacta	2	2	0.867
lateral dorsal thalamic nucleus	2	1	0.734		retrosplenial caudal ctx	9	17	0.742		motor trigeminal nucleus	2	1	0.868
CA1 ventral hippocampus	5.5	5	0.738		secondary somatosensory ctx	31.5	35	0.744		central amygdaloid nucleus	2.5	5	0.869
auditory ctx	22.5	96	0.744		magnocellular preoptic nucleus	1	1	0.764		anterior hypothalamic area	7	10	0.87
supraoptic nucleus hypothalamus	0	0	0.764		temporal ctx	3.5	4	0.766		auditory ctx	52.5	60	0.87
interposed nucleus	0	0	0.785		lateral dorsal thalamic nucleus	1.5	5	0.77		retrosplenial rostral ctx	64	96	0.87
CA2 hippocampus	0	1	0.79		raphe obscurus nucleus	3	3	0.771		White Matter	293.5	260	0.87
ventral medial striatum	7	8	0.799		visual 1 ctx	83.5	84	0.774		supraoptic nucleus hypothalamus	0	0	0.881
crus 2 of ansiform lobule	38.5	61	0.806		facial nucleus	8.5	7	0.805		pontine reticular nucleus caudal	3	6	0.901
White Matter	114	147	0.806		neural lobe pituitary	6	7	0.805		parabrachial nucleus	8.5	7	0.902
globus pallidus	0	3	0.825		6th cerebellar lobule	56.5	40	0.837		vestibular nucleus	16.5	12	0.902
facial nucleus	1.5	3	0.829		copula of the pyramis	34.5	25	0.838		basal amygdaloid nucleus	14	14	0.902
dorsal medial striatum	7	23	0.834		ventral anterior thalamic nucleus	0.5	0	0.86		claustrum	0.5	3	0.931
inferior colliculus	58	58	0.838		arcuate nucleus hypothalamus	3	3	0.868		ventral posteriolmedial thalamic nucleus	7	1	0.932
retrosplenial caudal ctx	5	23	0.868		8th cerebellar lobule	33	35	0.869		10th cerebellar lobule	14	18	0.934
8th cerebellar lobule	24.5	36	0.868		crus 1 of ansiform lobule	66.5	104	0.87		CA1 ventral hippocampus	9.5	17	0.935
visual 1 ctx	58	57	0.868		retrosplenial rostral ctx	45.5	93	0.87		dentate gyrus dorsal	49	29	0.935
4th cerebellar lobule	2.5	11	0.901		periolivary nucleus	0.5	0	0.895		subiculum dorsal	20.5	11	0.935
paraflocculus cerebellum	41	37	0.935		paraflocculus cerebellum	65	68	0.902		primary somatosensory ctx upper lip	53.5	48	0.935
dorsal medial nucleus	0	0	0.939		central amygdaloid nucleus	2	3	0.933		dorsal medial nucleus	0	0	0.939
locus ceruleus	0	0	0.939		ventral medial nucleus	5	4	0.934		locus ceruleus	0	0	0.939
subthalamic nucleus	0	0	0.939		7th cerebellar lobule	15	14	0.934		posterior thalamic nucleus	6.5	23	0.967
medial cerebellar nucleus fastigial	0	0	0.961		flocculus cerebellum	7.5	7	0.935		CA3 dorsal hippocampus	18	34	0.967
temporal ctx	3	4	0.966		paramedian lobule	56.5	65	0.935		pontine nuclei	32.5	33	0.967
10th cerebellar lobule	14	19	0.967		dorsal medial nucleus	0	0	0.939		crus 1 of ansiform lobule	74	85	0.967
caudal piriform ctx	16.5	14	0.967		CA1 ventral hippocampus	18	15	0.967		primary somatosensory ctx barrel field	102	99	0.967
copula of the pyramis	26.5	30	0.967		inferior colliculus	84.5	70	0.967		cortical amygdaloid nucleus	26.5	24	1
ectorhinal ctx	4.5	10	1		lateral hypothalamus	35.5	28	0.967		diagonal band of Broca	7	7	1
suprachiasmatic nucleus	0	0	1		suprachiasmatic nucleus	0	0	1		gigantocellular reticular nucleus pons	77.5	77	1
ventral anterior thalamic nucleus	0	0	1		trapezoid body	1	0	1		medial septum	0	0	1
pineal gland	0	0	NaN		pineal gland	0	0	NaN		suprachiasmatic nucleus	0	0	1
